# Supplementary material
Source: PubMed Central journal article supplement (PMC4113415)
Supplement: NIHMS605294-supplement-10822_2014_9747_MOESM1_ESM.pdf [file NIHMS605294-supplement-10822_2014_9747_MOESM1_ESM.pdf]

Correspondence: dmobley@uci.edu (David Mobley)

## Abstract:

This work provides a curated database of experimental and calculated hydration free energies for small molecules in water, along with experimental values and input files. Experimental values are taken from prior literature and will continue to be curated, with updated experimental references and data added as it becomes available. Calculated values are based on the GAFF small molecule force field in TIP3P water with AM1-BCC charges, as in the provided parameter files. Values were calculated using the GROMACS simulation package, with full details given in references cited within the database itself. This database builds on previous work from the Mobley lab and others, and extends the prior database. With deposition in eScholarship, the database is now versioned, allowing citation of specific versions of the database, and easier updates.

## Background:

This page provides an update of David Mobley's hydration free energy database. The current goal is to provide curated calculated and experimental values for every molecule which the Mobley group has studied at any point, and to allow these to be updated in a versioned manner as issues are found, better experimental data is tracked down or obtained, and so on.

The prior database gives calculated and experimental values for a 504 molecule set which has been called the "504 molecule set", or "the Mobley set" or similar variants. The explicit solvent study on this set was published in (1) and the implicit solvent version in (2), and the full database is in the supporting information. The "504 molecule set" built on earlier sets, notably that from Rizzo (3) and earlier hydration studies by David Mobley and collaborators.

The current set and format is motivated by several factors:

- There were several problems with specific molecules and/or experimental values in the 504 molecule set which needed correcting
- We have studied many additional molecules since then and these need adding to the set
- We need a way to continue sharing and expanding our set, providing *both* experimental data with references and calculated values (with parameters) as these are used as inputs to test other methods
- We want to be able to update the set in a versioned manner without having to write a new paper for every update, which necessitates migrating away from journal supporting information.

## What we provide:

The database consists of a .tar.gz file containing:

- database.txt: A semicolon delimited text file containing compound IDs, SMILES, IUPAC

- names or similar, experimental values and uncertainties, calculated values, DOIs for references, and notes. Format described in the header
- database.pickle: Python pickle file containing the same database, with some extra fields as well (notably, 'groups', which provides functional groups for the compounds as assigned by checkmol)
  - groups.txt: Functional groups for compounds as assigned by checkmol. Semicolon delimited. First field is compound ID, second field is compound name, and subsequent fields are functional groups.
  - iupac\_to\_cid.pickle, smiles\_to\_cid.pickle: Python pickle files containing conversion of IUPAC name to compound id and SMILES string to compound id, stored in dictionaries
  - Structure files:
    - mol2files\_sybyl: Mol2 files with partial charges as written by OEChem in Sybyl format/Sybyl atom types
    - mol2files\_gaff: Mol2 files with partial charges as used for our hydration free energy calculations (AMBER GAFF atom types)
    - sdf files: sdf files with partial charges as written by OEChem
    - topgro: GROMACS format topology and coordinate files as used for our AM1-BCC GAFF hydration free energy calculations. Technical note: There may be some variation as to whether water molecules are or are not included in these files; these are intended to be used for the small molecule parameters only.

## The future:

We plan to write a paper reporting the work done to create this database. This paper will provide a static version of the database.

In addition, we plan to maintain our database on the cite-able eScholarship repository of the University of California. It is currently available on that site at [www.escholarship.org/uc/item/6sd403pz](http://www.escholarship.org/uc/item/6sd403pz). Updated versions will be maintained there.

Please cite:

Mobley, David L. (2013). Experimental and Calculated Small Molecule Hydration Free Energies. UC Irvine: Department of Pharmaceutical Sciences, UCI. Retrieved from: <http://www.escholarship.org/uc/item/6sd403pz>

## Change log/version history:

This dataset started by taking all of the compounds we have studied previously with hydration free energies (references 1, 2, 4-9) including those from SAMPL4 and compiling them all into one big set, removing any redundancies and providing data, references, etc. for all of them. Details of changes for specific versions are found below.

On 12/20/2013 this database was moved to the eScholarship site of the University of California, at <http://www.escholarship.org/uc/item/6sd403pz>.

### Version 0.1:

- We corrected the following problems from the 504 molecule set (1-2):
  - Removal of 504/triacetyl glycerol, which was not the intended molecule (and the intended molecule, glycerol triacetate, is present in v0.1 anyway as it comes in via reference (5))
  - Correction of the experimental value for hexafluoropropene, which had (via (3)) incorrectly been the value for hexafluoro-propan-2-ol
  - Removed several duplicates within the set:
    - 2-methylbut-2-ene under two names
    - 3-methylbut-1-ene
    - benzonitrile vs cyanobenzene
  - Removed a "duplicate" butanal which had an incorrect experimental value
- We also corrected issues from other sets:
  - The molecule labeled penta-2-one in the set of (4) was penta-3-one; the corresponding experimental value was corrected from -3.52 kcal/mol to -3.41 kcal/mol.
  - The molecule "lindane" was removed from the set of reference (6) because the 3D structure has the incorrect stereoisomer and thus the calculations were wrong; this issue seems to have originated with the Guthrie 2009 experimental paper providing the source data.
  - We removed 'prometryn' (set of reference 6) because chemical structure (3D/2D) does not match the name -- an ethyl where there should be a dimethyl. Again this seems to have originated from Guthrie 2009 experimental paper with the source data.
  - We removed 'ethylene glycol diacetate' from the set of reference (5) because the 3D structure does not match the 2D structure as indicated in the paper. [See v0.2 notes -- this revision was actually a mistake, and in fact this was the correct compound, though the tools we were using did not properly parse the alternative name, "ethylene glycol diacetate".
  - Sulfonyl urea compounds with questionable vapor pressure were removed from the set of SAMPL1 (6) after consultation with J. Peter Guthrie, who had concerns about the quality of this data.
- Based on a cross-comparison with data from J. Peter Guthrie's dataset (in preparation), we updated several experimental values. Details of how these were changed and why are provided in the 'notes' field within the database itself. The compounds affected were:
  - 4-propylphenol
  - 4-bromophenol
  - 3-hydroxybenzaldehyde
  - 2-methoxyethanol
  - dimethyl sulfoxide (methanesulfinylmethane)
- Notes were added in a few other cases, especially for formaldehyde, and a number of IUPAC names were standardized

Currently this set contains 642 molecules. Full details will be provided in a paper reporting this database.

Please also note that some discrepancies between experimental values here and values in J. Peter Guthrie's database are still being investigated, so we expect that a new version will be released relatively shortly which will update some subset of the experimental values (less than 60, but more than zero).

## Version 0.2:

- Corrected the experimental references from one of our earlier papers (10.1021/jp0667442) which incorrectly reported the data as having come from the Rizzo set, but it instead came from Abraham et al. 1990 (10.1039/P29900000291). Updated experimental uncertainty estimates for this set to match the Abraham et al. "suggestion" of 0.2 kcal/mol
- Corrected the experimental value for 1,3-butadiene (and the experimental reference), as pointed out by Christopher Bayly (OpenEye Software). Specifically, the Hine and Mookerjee paper (JOC (1975) 40:292) finds two experimental values for 1,3-butadiene:  $-\log(cg)=1.39$  and  $-\log(cw)=1.87$ . From these, he derives a value of -0.41 for the former minus the latter, which leads to a transfer free energy of 0.56 kcal/mol. The correct difference is -0.48 not -0.41, which leads to a transfer free energy of 0.65 kcal/mol. This applies to compound mobley\_511661, IUPAC 'butadiene'. The prior value was listed as 0.6 kcal/mol in this set (0.56 kcal/mol rounded). The citation was updated as well to point to this original experimental data.
- Updating 2,6-dichlorosyringaldehyde (mobley\_6195751) and 3,5-dichloro-2,6-methoxyphenol (mobley\_6688723) with improved values from J. Peter Guthrie's SAMPL4 writeup which were NOT used in the SAMPL4 challenge, as he didn't make final changes until many people's manuscripts were submitted. These took the values for 2,6-dichlorosyringaldehyde from  $-8.24\pm 0.76$  to  $-8.68\pm 0.76$ , and 3,5-dichloro-2,6-methoxyphenol from  $-6.24\pm 0.38$  kcal/mol to  $-6.44\pm 0.38$  kcal/mol
- Updated (2E)-hex-2-enal, mobley\_2792521, with detailed experimental references and a slight update to the hydration free energy ( $-3.60$  kcal/mol, vs previous value of  $-3.68$  kcal/mol) based on a weighted average of the available experimental data.
- Re-added "ethylene glycol diacetate" (which was removed under v0.1) from reference (5) as this was in fact the correct compound, and had been removed because of issues relating to handling of the name. This has been assigned the more standard name, "2-acetoxyethyl acetate".
- Updated uncertainty estimates for experimental values in the set of reference (5) to 0.2 rather than 0.6 kcal/mol, to match the estimate given in reference (5).
- Experimental references were updated/corrected, typically by drilling down (for example, in v0.1, the experimental citation for the 504 molecule set was listed as reference (2); now, references point to reference (3), the reference for the Bordner set, and to original source data, depending on the compound). Much more could be done here, but as substantial manual intervention is needed it is unlikely to happen soon.
- In v0.1, IUPAC names for various compounds were supposed to have been modified to make them easier to parse (essentially, standardization of various nonstandard names) and this was reflected in the notes field for these compounds. However, the IUPAC names themselves were never updated. These have now been corrected.
- In preparation for adding PubChem compound IDs, we detected several IUPAC name/SMILES string pairs which did not lead to a compound on PubChem. Alternate IUPAC names were assigned as follows:
  - mobley\_2636578, formerly 1,3-bis-(nitrooxy)propane, renamed as 3-nitrooxypropyl nitrate
  - mobley\_819018, formerly trans-3,7-Dimethylocta-2,6-dien-1-ol, renamed as (2E)-3,7-dimethylocta-2,6-dien-1-ol
- PubChemIDs for all compounds were added automatically using PubChemPy by looking up compounds via IUPAC name, with a fallback to SMILES string. In several cases cases (mobley\_6843802, [(1R)-1,2,2-trifluoroethoxy]benzene; mobley\_7869158, [(2S)-butan-2-yl]

nitrate; and mobley\_9741965, 1,3-bis-(nitrooxy)butane) the PubChem ID was assigned manually because of issues with PubChem's name for the compound and/or issues relating to PubChem not specifying stereochemistry for a chiral center.

### Version 0.21:

- The structure files for 2-acetoxyethyl acetate, mobley\_4689084, SMILES CC(=O)OCCOC(=O)C, contained multiple conformations of the molecule. This was corrected. Additionally, the .sdf file for this molecule had been written in mol2 format.

### Version 0.3:

- Due to bug(s) in Checkmol and issues with its handling of the .mol2 file format, functional groups assigned to some molecules were incorrect (for example, around eight molecules were incorrectly labeled as cations, with no other groups correctly assigned). After correspondence with the authors, we switched to running checkmol on the associated .sdf files, which are better supported by the program, eliminating these problems. All functional groups were re-computed and re-stored.

## References:

- (1) Mobley, D. L., Bayly, C. I., Cooper, M. D., Shirts, M. R., & Dill, K. A. (2009). Small Molecule Hydration Free Energies in Explicit Solvent: An Extensive Test of Fixed-Charge Atomistic Simulations. *Journal of Chemical Theory and Computation*, 5(2), 350–358.
- (2) Mobley, D. L., Dill, K., & Chodera, J. D. (2008). Treating entropy and conformational changes in implicit solvent simulations of small molecules. *The Journal of Physical Chemistry B*, 112(3), 938.
- (3) Rizzo, R. C., Aynechi, T., Case, D. A., & Kuntz, I. D. (2006). Estimation of Absolute Free Energies of Hydration Using Continuum Methods: Accuracy of Partial Charge Models and Optimization of Nonpolar Contributions. *Journal of Chemical Theory and Computation*, 2(1), 128–139. doi:10.1021/ct050097l
- (4) Mobley, D. L., Dumont, É., Chodera, J. D., & Dill, K. (2007). Comparison of charge models for fixed-charge force fields: Small-molecule hydration free energies in explicit solvent. *The Journal of Physical Chemistry B*, 111(9), 2242–2254.
- (5) Nicholls, A., Mobley, D. L., Guthrie, J. P., Chodera, J. D., Bayly, C. I., Cooper, M. D., & Pande, V. S. (2008). Predicting small-molecule solvation free energies: an informal blind test for computational chemistry. *Journal of Medicinal Chemistry*, 51(4), 769–779. doi:10.1021/jm070549+
- (6) Mobley, D. L., Bayly, C. I., Cooper, M. D., & Dill, K. A. (2009). Predictions of hydration free energies from all-atom molecular dynamics simulations. *The Journal of Physical Chemistry B*, 113(14), 4533–4537. doi:10.1021/jp806838b
- (7) Klimovich, P., & Mobley, D. L. (2010). Predicting hydration free energies using all-atom molecular dynamics simulations and multiple starting conformations. *Journal of Computer-Aided Molecular Design*, 24(4), 307–316.
- (8) Mobley, D. L., Liu, S., Cerutti, D. S., Swope, W. C., & Rice, J. E. (2012). Alchemical prediction of hydration free energies for SAMPL. *Journal of Computer-Aided Molecular Design*, 26(5), 551–562. doi:10.1007/s10822-011-9528-8
- (9) Mobley, D. L., Wymer, K. L., Lim, N. M., Guthrie, J. P. (2014) "Blind prediction of solvation free energies from the SAMPL4 challenge", *Journal of Computer-Aided Molecular Design*, in press.
